# Supplementary material
Source: PubMed Central journal article supplement (PMC2851488)
Supplement: NIHMS178332-supplement-Supplemental_Fig_Legends.pdf [file NIHMS178332-supplement-Supplemental_Fig_Legends.pdf]

**Figure S1.** IAV-specific CD8 T cells are reduced in the lymph nodes of lethal dose IAV infected mice. Mice were infected with either a 10LD<sub>50</sub> or 0.1LD<sub>50</sub> of IAV and on day 5 p.i. the number of HA<sub>529</sub>, HA<sub>204</sub> and NP<sub>147</sub> tetramer<sup>+</sup> CD8<sup>+</sup>CD3<sup>+</sup> cells were enumerated. Data are representative of 3 independent experiments.

**Figure S2.** Dividing CD43<sup>+</sup> CD8 T cells express Fas during IAV infections. CD90.2 CL-4 T cells were purified as described in Figure 3 and labeled with 25 $\mu$ m CFSE and then transferred into CD90.1 wild-type mice. On day 3 p.i. LN were removed and Fas expression on CD8<sup>+</sup>CD90.2<sup>+</sup>CFSE<sup>-</sup>CD43<sup>+</sup> and CD8<sup>+</sup>CD90.2<sup>+</sup>CFSE<sup>+</sup>CD43<sup>-</sup> CL-4 T cells was measured.

**Figure S3.** In vitro activated IAV-specific and non IAV-specific CD8 T cells express similar levels of CD43 and Fas. CD8 T cells from the spleens of naïve CL-4 and DUC18 transgenic mice were purified and cultured for 3 days in the presence of  $\alpha$ CD3/CD28 antibodies in order to activate the T cells. Shown is the level of CD43 expression on CD8<sup>+</sup> gated cells (upper panel) or the expression of Fas by CD8<sup>+</sup>CD43<sup>+</sup> T cells (lower panel)
